# Supplementary material for: De novo transcriptome analyses provide insights into opsin-based photoreception in the lanternshark Etmopterus spinax
Source: PubMed Central journal article supplement (PMC6312339; doi:10.1371/journal.pone.0209767), 2018-12-31

**A. Length distribution of *E.spinax* ventral-skin contigs**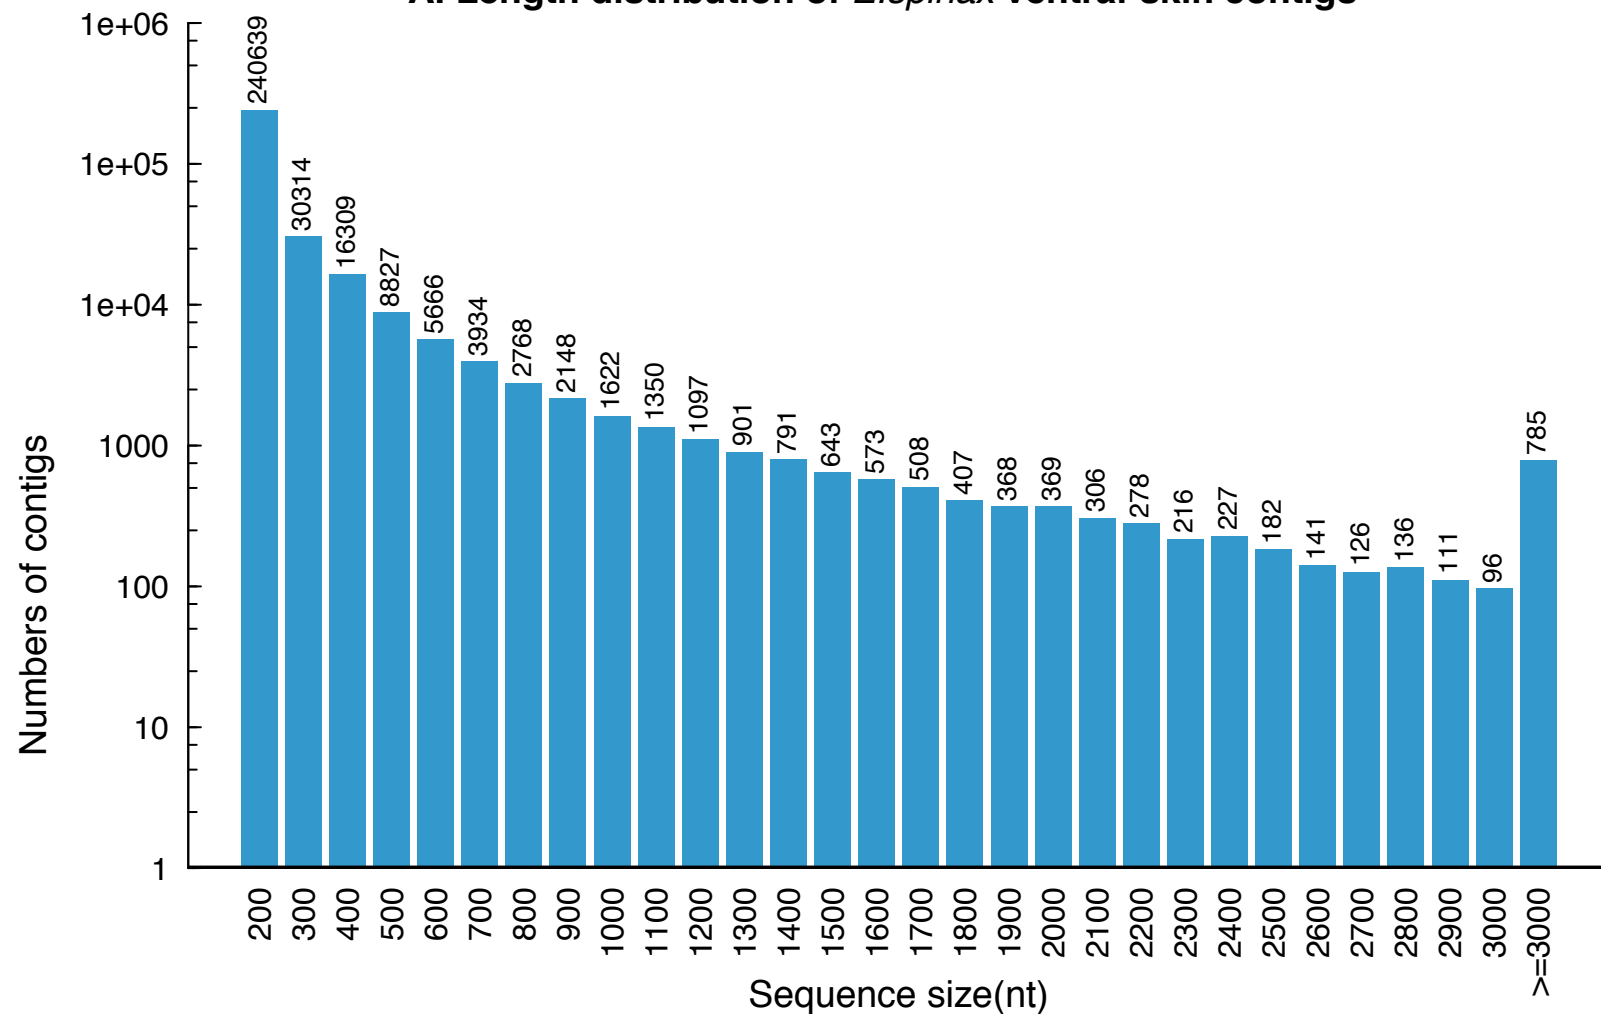**B. Length distribution of *E.spinax* eye contigs**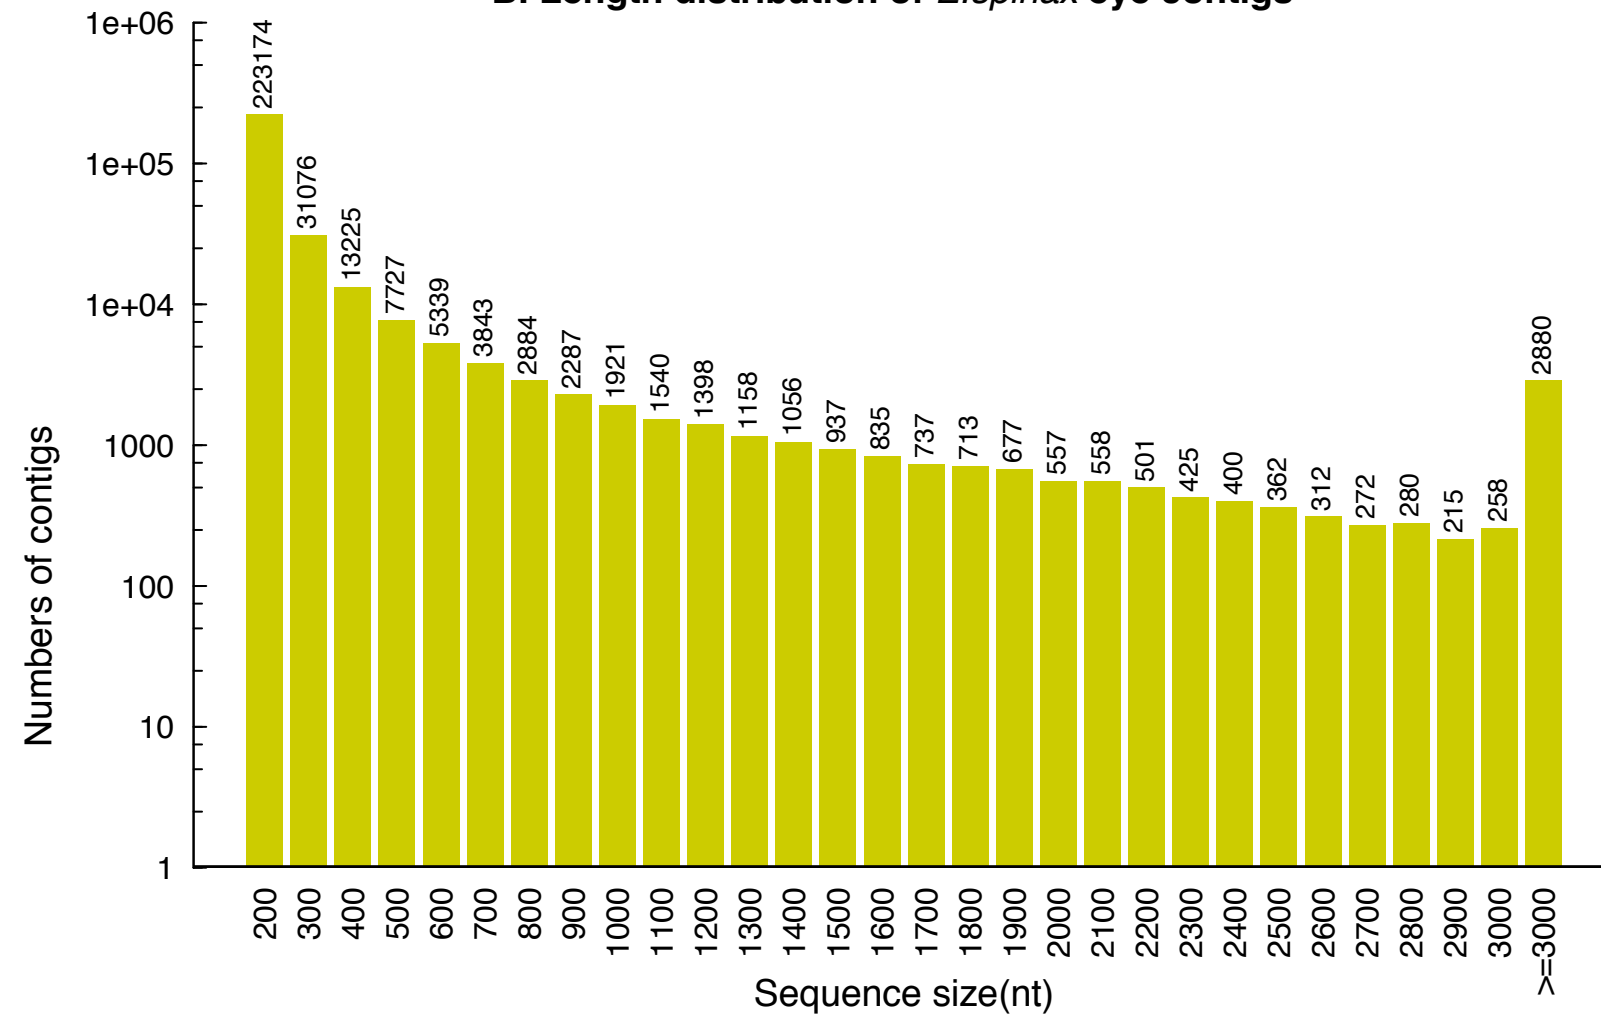**C. Length distribution of *E.spinax* ventral-skin unigenes**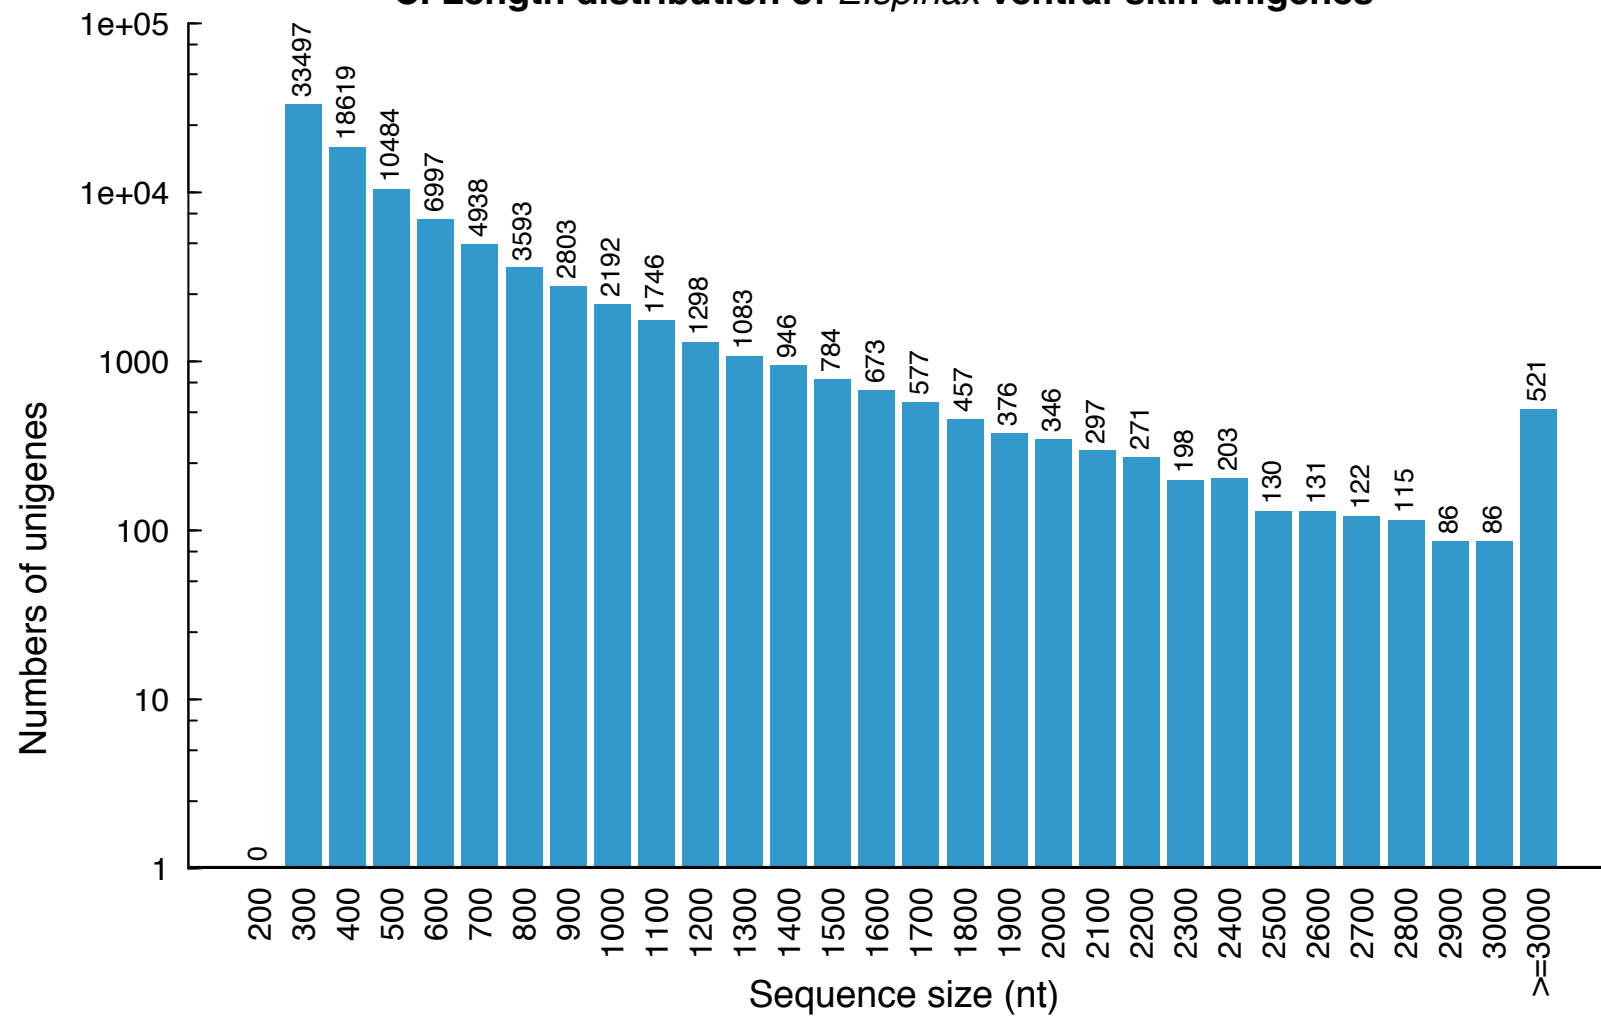**D. Length distribution of *E.spinax* eye unigenes**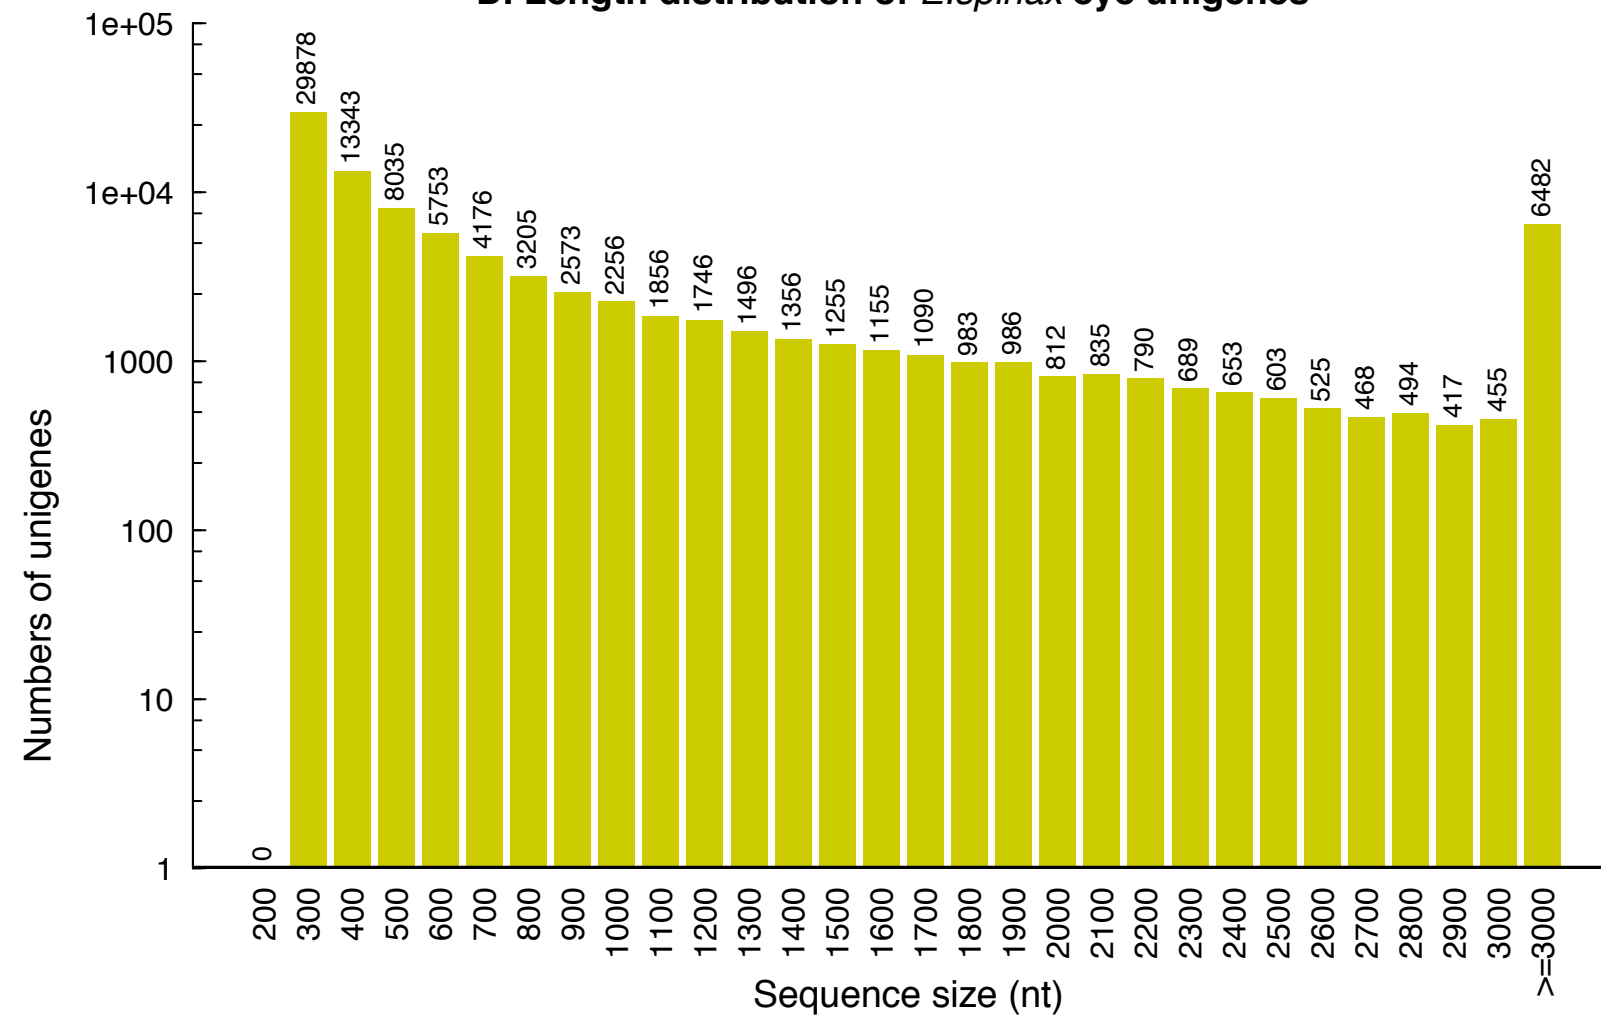

Supplement: pone.0209767.s004.pdf [file pone.0209767.s004.pdf]
