# Supplementary material for: De novo transcriptome analyses provide insights into opsin-based photoreception in the lanternshark Etmopterus spinax
Source: PubMed Central journal article supplement (PMC6312339; doi:10.1371/journal.pone.0209767), 2018-12-31

Taxonomic distribution

A

**Pooled *E. spinax* transcriptome**  
(119,749 unigenes)

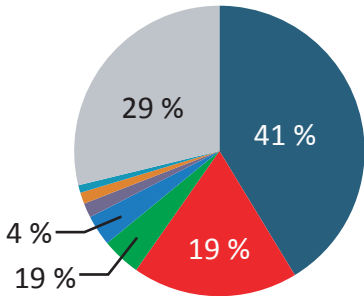

54,196 hits to NR

**Taxonomy-based filtration**  
(i.e., only *Eucaryotes* excluding *Plantae*)

C

**Reference *E. spinax* transcriptome**  
(104,390 unigenes)

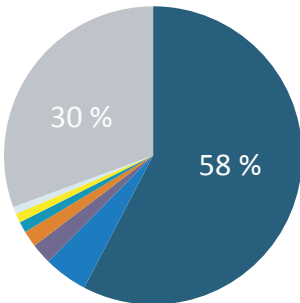

38,836 hits to NR

B

**Ventral skin *E. spinax* transcriptome**  
(93,569 unigenes)

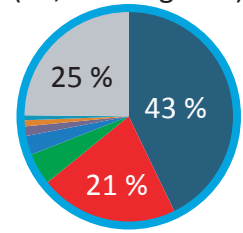

48,063 hits to NR

**Eye *E. spinax* transcriptome**  
(94,365 unigenes)

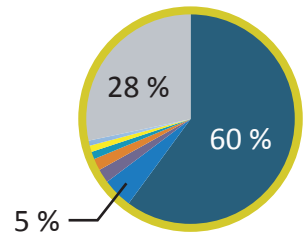

37,920 hits to NR

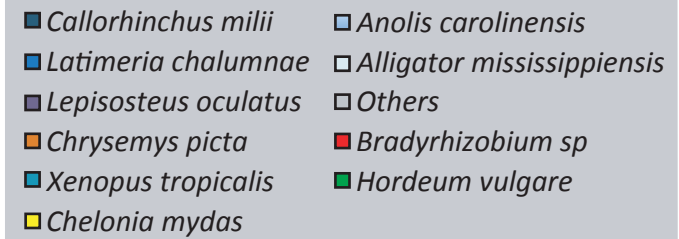

E-value distribution

D

**Reference *E. spinax* transcriptome**  
(104,390 unigenes)

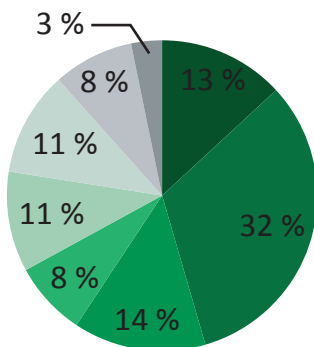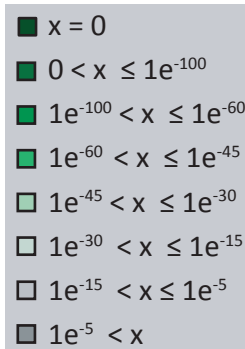

Supplement: pone.0209767.s005.pdf [file pone.0209767.s005.pdf]
