# Supplementary material for: De novo transcriptome analyses provide insights into opsin-based photoreception in the lanternshark Etmopterus spinax
Source: PubMed Central journal article supplement (PMC6312339; doi:10.1371/journal.pone.0209767), 2018-12-31
Supplement: pone.0209767.s008.pdf [file pone.0209767.s008.pdf]

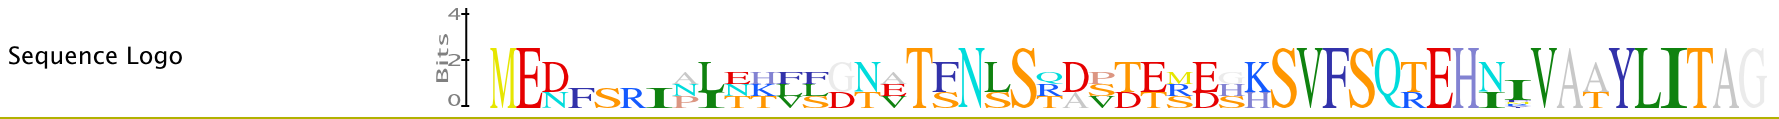

|                                       |   |   |    |    |   |
|---------------------------------------|---|---|----|----|---|
| H. sapiens peropsin (NP006574.1)      | 1 | 9 | 17 | 27 |   |
|                                       | M | L | R  | N  | N |
| L. oculatus Peropsin (XP_015200719.1) | M | E | N  | F  | S |
| C. milii Peropsin (XP_007895211)      | M | E | D  | -  | - |
| R. typus Peropsin (XP_020384809)      | M | E | D  | -  | - |
| E. spinax Peropsin (Unigene28941_All) | M | E | D  | -  | - |

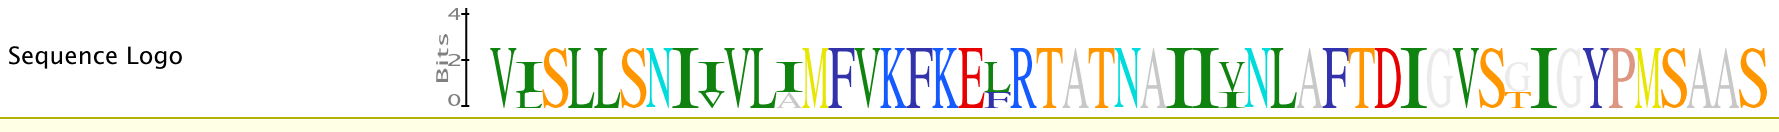

|                                       |    |    |    |    |    |
|---------------------------------------|----|----|----|----|----|
| H. sapiens peropsin (NP006574.1)      | 37 | 47 | 57 | 67 | 77 |
|                                       | M  | I  | S  | I  | S  |
| L. oculatus Peropsin (XP_015200719.1) | V  | .  | L  | L  | .  |
| C. milii Peropsin (XP_007895211)      | V  | .  | L  | L  | .  |
| R. typus Peropsin (XP_020384809)      | V  | L  | .  | L  | L  |
| E. spinax Peropsin (Unigene28941_All) | V  | L  | .  | L  | L  |

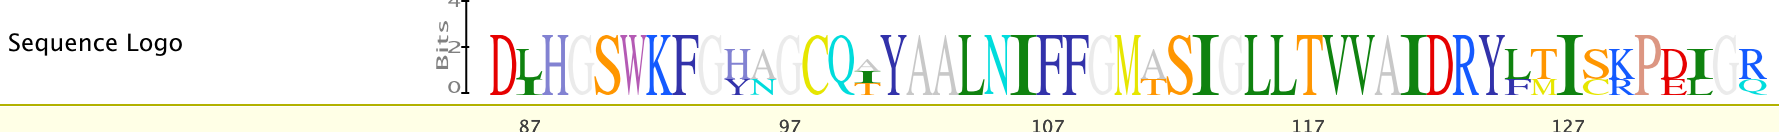

|                                       |    |    |     |     |     |
|---------------------------------------|----|----|-----|-----|-----|
| H. sapiens peropsin (NP006574.1)      | 87 | 97 | 107 | 117 | 127 |
|                                       | D  | L  | H   | G   | S   |
| L. oculatus Peropsin (XP_015200719.1) | .  | I  | H   | .   | .   |
| C. milii Peropsin (XP_007895211)      | .  | H  | .   | .   | .   |
| R. typus Peropsin (XP_020384809)      | .  | H  | .   | .   | .   |
| E. spinax Peropsin (Unigene28941_All) | .  | H  | .   | .   | .   |

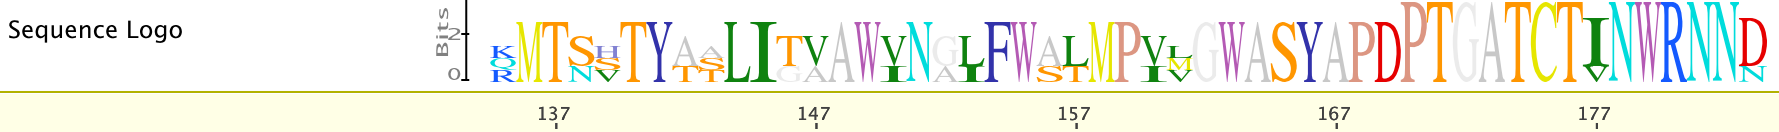

|                                       |     |     |     |     |     |
|---------------------------------------|-----|-----|-----|-----|-----|
| H. sapiens peropsin (NP006574.1)      | 137 | 147 | 157 | 167 | 177 |
|                                       | R   | M   | T   | T   | N   |
| L. oculatus Peropsin (XP_015200719.1) | Q   | .   | S   | H   | .   |
| C. milii Peropsin (XP_007895211)      | .   | .   | S   | S   | .   |
| R. typus Peropsin (XP_020384809)      | K   | .   | N   | V   | .   |
| E. spinax Peropsin (Unigene28941_All) | .   | .   | .   | .   | .   |

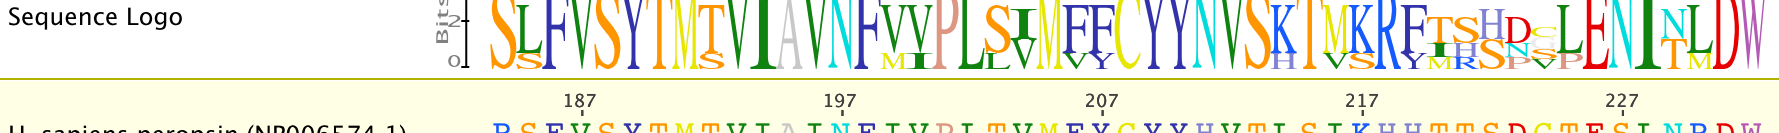

|                                       |     |     |     |     |     |
|---------------------------------------|-----|-----|-----|-----|-----|
| H. sapiens peropsin (NP006574.1)      | 187 | 197 | 207 | 217 | 227 |
|                                       | R   | S   | F   | V   | S   |
| L. oculatus Peropsin (XP_015200719.1) | S   | .   | .   | .   | .   |
| C. milii Peropsin (XP_007895211)      | S   | L   | .   | .   | .   |
| R. typus Peropsin (XP_020384809)      | S   | L   | .   | .   | .   |
| E. spinax Peropsin (Unigene28941_All) | S   | L   | .   | .   | .   |

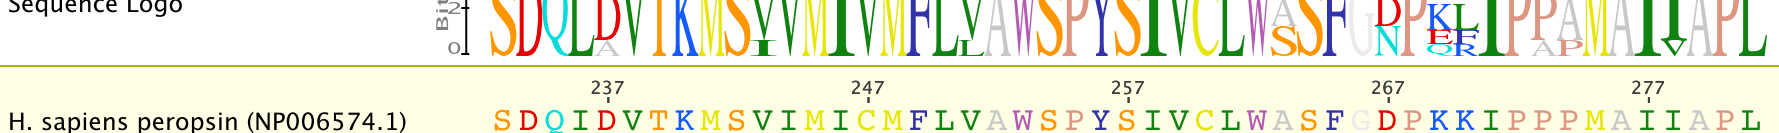

|                                       |     |     |     |     |     |
|---------------------------------------|-----|-----|-----|-----|-----|
| H. sapiens peropsin (NP006574.1)      | 237 | 247 | 257 | 267 | 277 |
|                                       | S   | D   | Q   | I   | D   |
| L. oculatus Peropsin (XP_015200719.1) | .   | .   | .   | .   | .   |
| C. milii Peropsin (XP_007895211)      | .   | .   | .   | .   | .   |
| R. typus Peropsin (XP_020384809)      | .   | .   | .   | .   | .   |
| E. spinax Peropsin (Unigene28941_All) | .   | .   | .   | .   | .   |

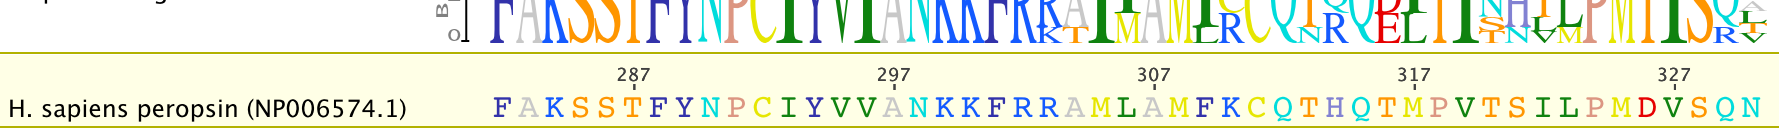

|                                       |     |     |     |     |     |
|---------------------------------------|-----|-----|-----|-----|-----|
| H. sapiens peropsin (NP006574.1)      | 287 | 297 | 307 | 317 | 327 |
|                                       | F   | A   | K   | S   | S   |
| L. oculatus Peropsin (XP_015200719.1) | .   | .   | .   | .   | .   |
| C. milii Peropsin (XP_007895211)      | .   | .   | .   | .   | .   |
| R. typus Peropsin (XP_020384809)      | .   | .   | .   | .   | .   |
| E. spinax Peropsin (Unigene28941_All) | .   | .   | .   | .   | .   |

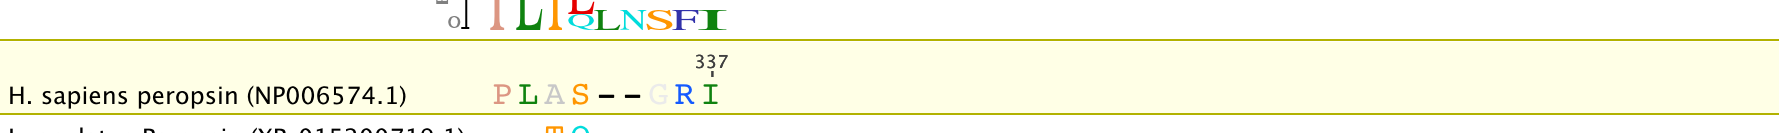

|                                       |     |   |
|---------------------------------------|-----|---|
| H. sapiens peropsin (NP006574.1)      | 337 |   |
|                                       | P   | L |
| L. oculatus Peropsin (XP_015200719.1) | .   | . |
| C. milii Peropsin (XP_007895211)      | .   | . |
| R. typus Peropsin (XP_020384809)      | .   | . |
| E. spinax Peropsin (Unigene28941_All) | .   | . |
