# Supplementary material for: De novo transcriptome analyses provide insights into opsin-based photoreception in the lanternshark Etmopterus spinax
Source: PubMed Central journal article supplement (PMC6312339; doi:10.1371/journal.pone.0209767), 2018-12-31

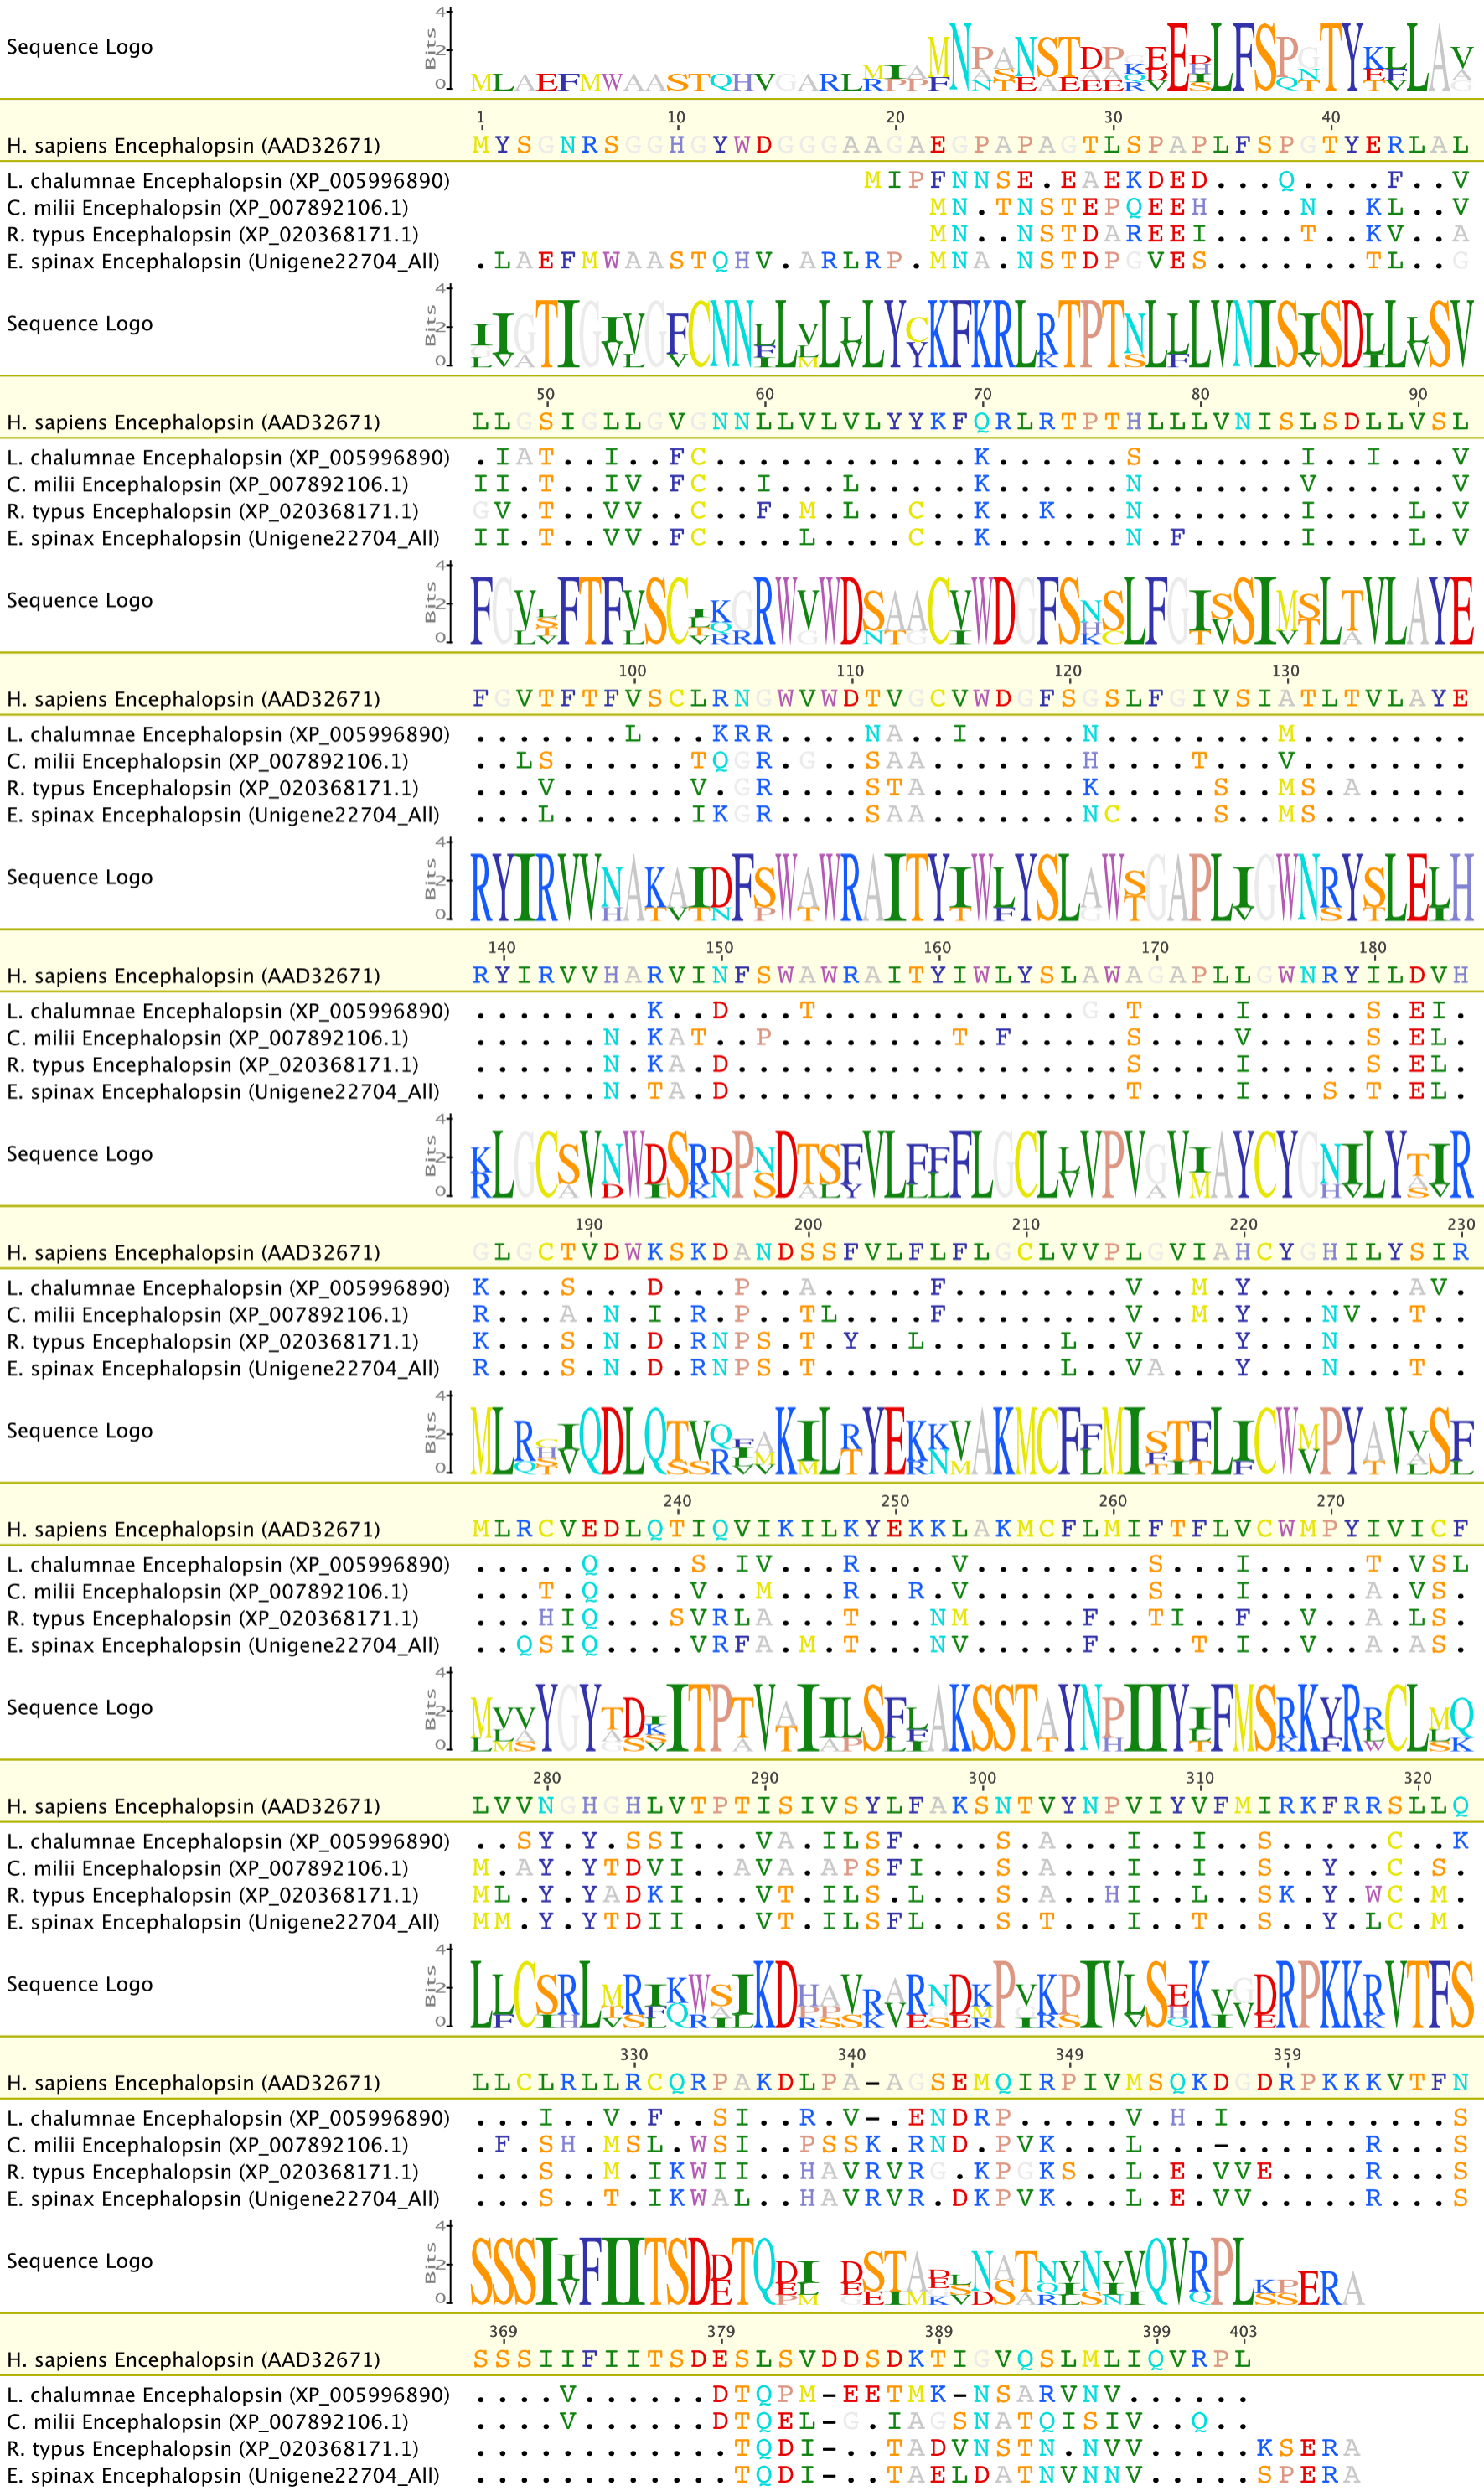

Supplement: pone.0209767.s009.pdf [file pone.0209767.s009.pdf]
